# Supplementary material for: An unprecedented (4,10)-connected porous metal–organic framework containing two rare large secondary building units (SBUs)
Source: Royal Society of Chemistry journal article supplement (doi:10.1039/c2ce06555j), 2012-01-01
Supplement: c2ce06555j.pdf [file c2ce06555j.pdf]

Supporting information for

# **An unprecedented (4, 10)-connected porous metal-organic framework containing two rare large second building units (SBUs)<sup>†</sup>**

Di-Chang Zhong, Ji-Hua Deng, Xu-Zhong Luo, Tong-Bu Lu and Ke-Jun Wang

## **Experimental Section**

**General Remarks.** All of the chemicals are commercially available and used without further purification. Elemental analyses were determined using Elementar Vario EL elemental analyser. The IR spectra were recorded in the 4000 to 400 cm<sup>-1</sup> region using KBr pellets and a Bruker EQUINOX 55 spectrometer. The Powder X-ray diffraction patterns were recorded on D8 ADVANCE X-Ray Diffractometer. The thermogravimetric analyses (TGA) was carried out on Netzsch TG-209 Thermogravimetry Analyzer in air atmosphere. The fluorescent measurement was conducted on a RF-5301PC spectrometer. The single crystal data were collected on a Bruker Smart 1000 CCD diffractometer.

**X-ray Crystallography.** Single-crystal data for **1** were collected on a Bruker Smart 1000 CCD diffractometer, with Mo-K $\alpha$  radiation ( $\lambda = 0.71073 \text{ \AA}$ ). All empirical absorption corrections were applied using the SADABS program.<sup>1</sup> The structure was solved using direct methods, which yielded the positions of all non-hydrogen atoms. These were refined first isotropically and then anisotropically. The hydrogen atoms attached to the ligands were placed in calculated position, with fixed isotropic thermal parameters and included in the structure factor calculation in the final stage of full-matrix least-squares refinement. The hydrogen atoms of lattice H<sub>2</sub>O molecules were not added. All calculations were performed using the SHELXTL system of computer programs.<sup>2</sup>

## Topological Analysis by TOPOS 4.0.

Atom coordinates (C1 = 4-connected SBUA, C2 = 10-connected SBUB)

Topology for C1

The links to atom C1

|    |        |         |        |          |         |
|----|--------|---------|--------|----------|---------|
| C1 | 0.3824 | 0.5000  | 0.5000 | (0 0 0)  | 0.764 Å |
| C1 | 0.3824 | -0.5000 | 0.5000 | (0 -1 0) | 0.764 Å |
| C2 | 0.0000 | 0.0000  | 0.0000 | (0 0 0)  | 1.021 Å |
| C2 | 0.0000 | 0.0000  | 1.0000 | (0 0 1)  | 1.021 Å |

Topology for C2

The links to atom C2

|    |         |         |         |           |       |
|----|---------|---------|---------|-----------|-------|
| C1 | 0.1176  | 0.0000  | 0.5000  | (0 0 0)   | 1.021 |
| C1 | 0.1176  | 0.0000  | -0.5000 | (0 0 -1)  | 1.021 |
| C1 | -0.1176 | 0.0000  | 0.5000  | (0 0 0)   | 1.021 |
| C1 | -0.1176 | 0.0000  | -0.5000 | (0 0 -1)  | 1.021 |
| C2 | 0.0000  | -1.0000 | 0.0000  | (0 -1 0)  | 1.094 |
| C2 | 0.0000  | 1.0000  | 0.0000  | (0 1 0)   | 1.094 |
| C2 | -0.5000 | -0.5000 | 0.0000  | (-1 -1 0) | 1.146 |
| C2 | 0.5000  | 0.5000  | 0.0000  | (0 0 0)   | 1.146 |
| C2 | 0.5000  | -0.5000 | 0.0000  | (0 -1 0)  | 1.146 |
| C2 | -0.5000 | 0.5000  | 0.0000  | (-1 0 0)  | 1.146 |

Coordination sequences

|     |   |    |    |     |     |     |      |      |      |      |
|-----|---|----|----|-----|-----|-----|------|------|------|------|
| C1  | 1 | 2  | 3  | 4   | 5   | 6   | 7    | 8    | 9    | 10   |
| Num | 4 | 19 | 60 | 122 | 206 | 304 | 422  | 556  | 710  | 880  |
| Cum | 5 | 24 | 84 | 206 | 412 | 716 | 1138 | 1694 | 2404 | 3284 |

|     |    |    |     |     |     |     |      |      |      |      |
|-----|----|----|-----|-----|-----|-----|------|------|------|------|
| C2  | 1  | 2  | 3   | 4   | 5   | 6   | 7    | 8    | 9    | 10   |
| Num | 10 | 38 | 82  | 146 | 226 | 326 | 442  | 578  | 730  | 902  |
| Cum | 11 | 49 | 131 | 277 | 503 | 829 | 1271 | 1849 | 2579 | 3481 |

Vertex symbols for selected sublattice

C1 Point (Schlafli) symbol:  $\{4^5 \cdot 5\}$

Extended point symbol:  $[4 \cdot 4 \cdot 4 \cdot 4 \cdot 4 \cdot 5(2)]$

C2 Point (Schlafli) symbol:  $\{3^6 \cdot 4^{16} \cdot 5^{11} \cdot 6^{10} \cdot 8^2\}$

Extended point symbol:

$[3 \cdot 3 \cdot 3 \cdot 3 \cdot 3 \cdot 3 \cdot 4 \cdot 5(2) \cdot 6(2) \cdot 6(2) \cdot 6(5) \cdot 8(20) \cdot 8(20)]$

Point (Schlafli) symbol for net:  $\{3^6 \cdot 4^{16} \cdot 5^{11} \cdot 6^{10} \cdot 8^2\} \{4^5 \cdot 5\}_2$

4,10-c net with stoichiometry  $(4-c)_2(10-c)$ ; 2-nodal net

New topology, please contact the authors (78739 types in 10 databases)

Elapsed time: 19.67 sec.

## References

- 1 G. M. Sheldrick, *SADABS, Program for Empirical Absorption Correction of Area Detector Data*; University of Göttingen: Göttingen, 1996.
- 2 G. M. Sheldrick, *SHELXS 97, Program for Crystal Structure Refinement*; University of Göttingen, Göttingen, 1997.

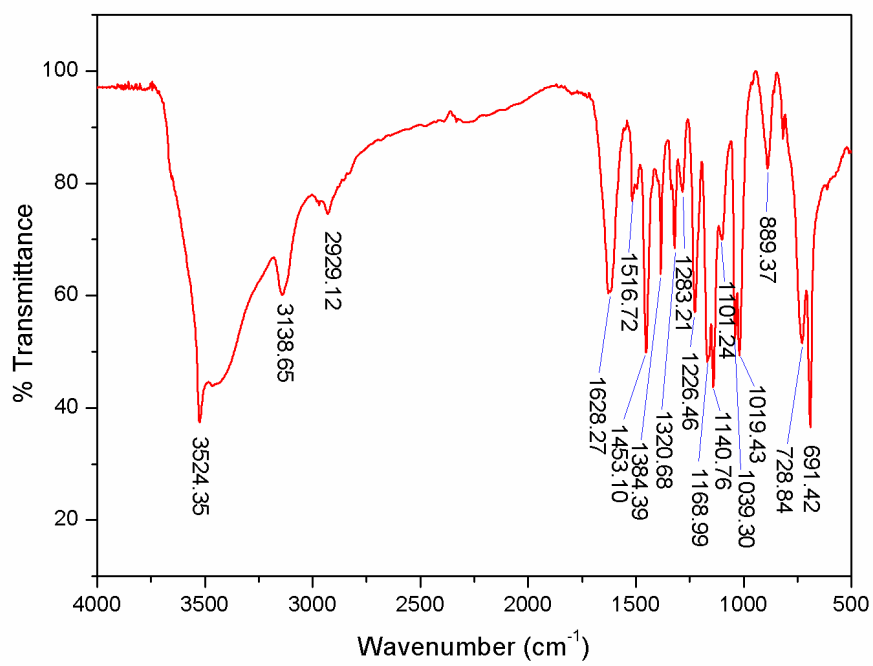

**Fig. S1** The IR spectra of **1**

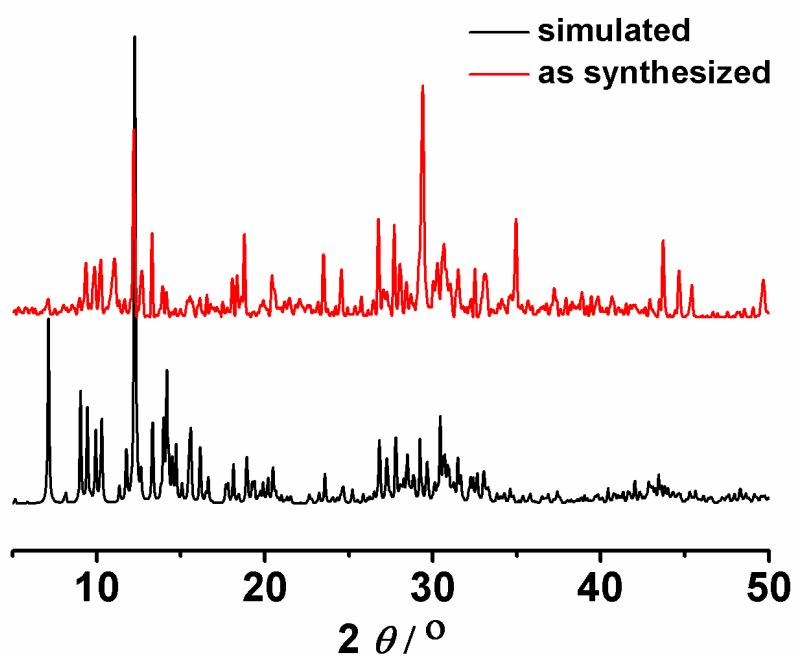

**Fig. S2** The powder X-ray diffraction patterns for **1** measured at room temperature.

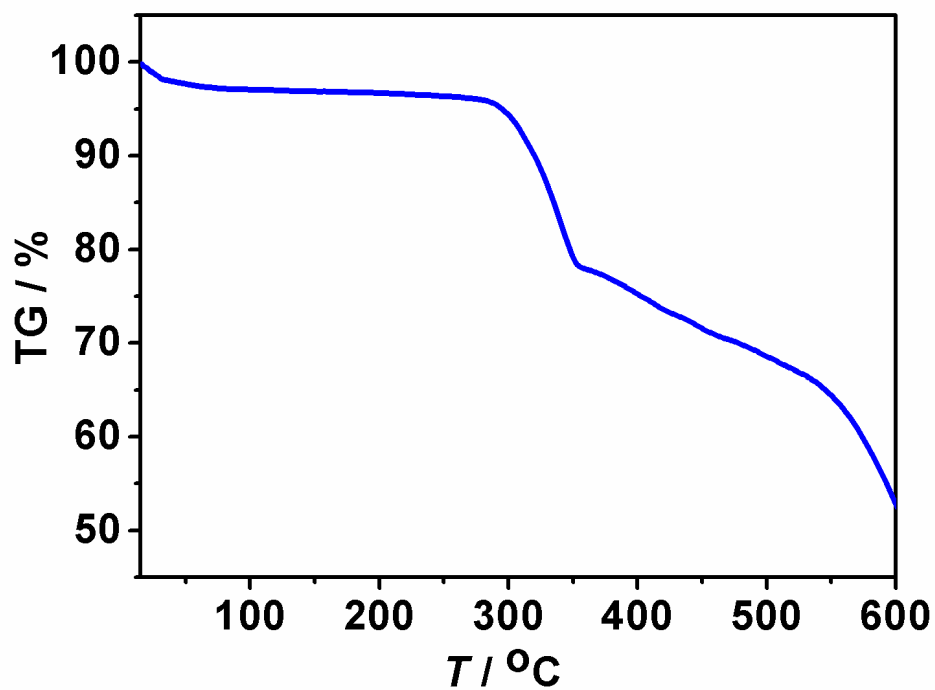

Fig. S3 The TGA curves for 1.
